# Supplementary material
Source: PubMed Central journal article supplement (PMC10056880)
Supplement: NIHMS1779782-supplement-Figure_S2.pdf [file NIHMS1779782-supplement-Figure_S2.pdf]

# Supplemental Figure 2

**A**

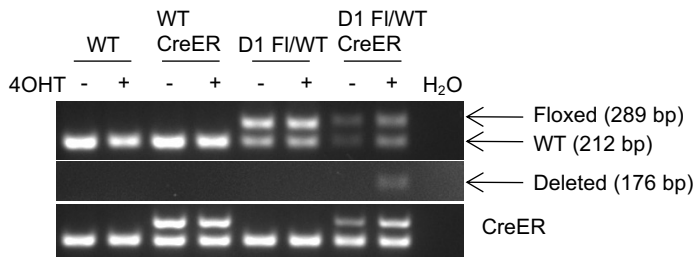

**B**

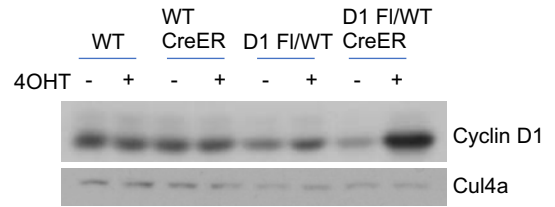

**C**

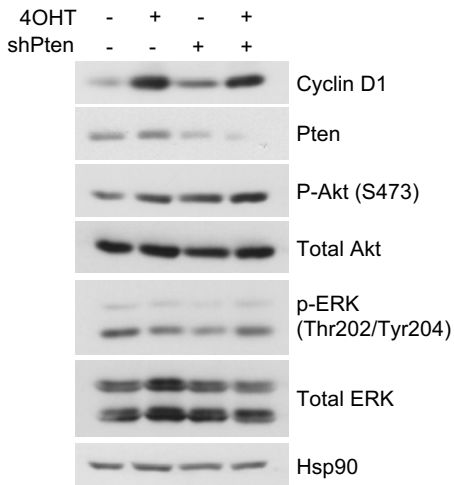

Figure S2. Characterization of cyclin D1<sup>FI/WT</sup> MEFs.

(A-B) Cyclin D1<sup>FI/WT, CreER</sup>, cyclin D1<sup>FI/WT</sup>, cyclin D1<sup>WT/WT, CreER</sup>, or WT MEFs were treated with or without 4-hydroxytamoxifen (4OHT) (200nM) for 3 days. (A) PCR analysis of genomic DNA (100 ng) isolated from each genotype using F1+R1 and F3+R3 (described in Fig 1). (B) Western blot analysis of lysates from each genotype using antibodies to cyclin D1 and Cul4a. (C). Western blot analysis of lysates from primary cyclin D1<sup>FI/WT, CreER</sup> mouse embryonic fibroblasts (MEFs) with or without treatment of 4OHT or knockdown of Pten using antibodies to cyclin D1, Pten, phosphorylation of Akt (S473), total Akt, phosphorylation of ERK (Thr202/Tyr204), total ERK and  $\beta$ actin.
