# Supplementary material
Source: PubMed Central journal article supplement (PMC10056880)
Supplement: NIHMS1779782-supplement-Figure_S3.pdf [file NIHMS1779782-supplement-Figure_S3.pdf]

# Supplemental Figure 3

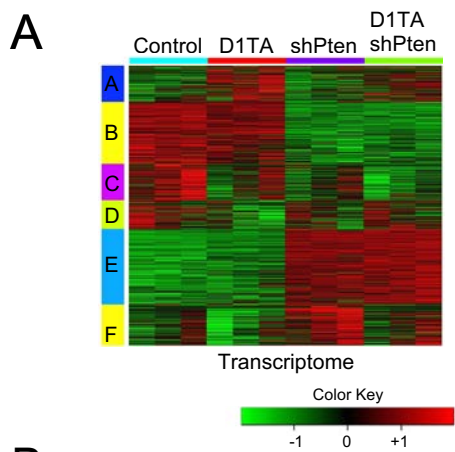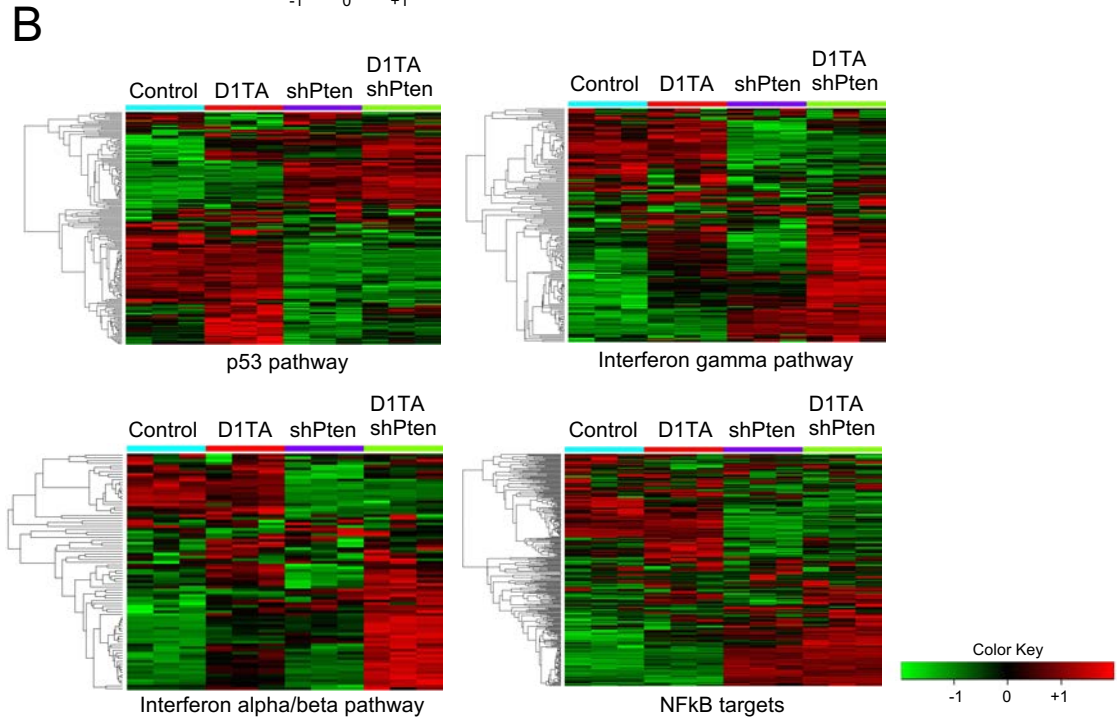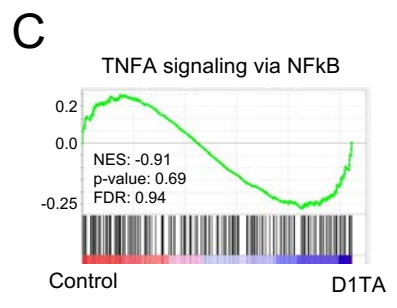

Figure S3. Comprehensive analysis of MEFs expressing cyclin D1 T286A and/or Pten knockdown.

(A) Heatmap with hierarchical clustering of MEFs treated with or without 4-hydroxytamoxifen or knockdown of Pten. (B) Heatmap with hierarchical clustering for E2f targets, p53 pathway, interferon alpha/beta pathway, interferon gamma of samples from (A). (C) Gene Set Enrichment Analysis (GSEA) of primary MEFs expressing cyclin D1 T286A compared to WT MEFs for TNFA signaling via NFkB.
